# Supplementary material
Source: Springer Nature journal article supplement (https://www.springermedizin.de/resource/supplementary/12936_2013_3050_MOESM6_ESM.pdf/9544958)
Supplement: MOESM6 [file 9544958]

**a**  
Chloroquine

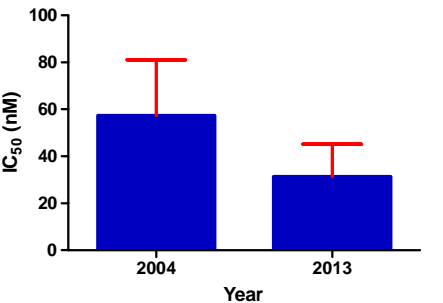

(NB: Before and after change in drug policy)

**b**  
Amodiaquine

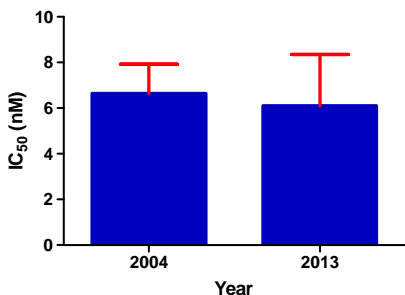

(NB: Before and after change in drug policy)

**c**  
Quinine

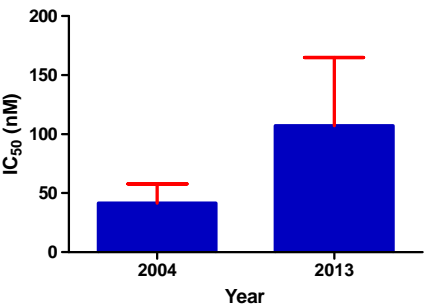

(NB: Before and after change in drug policy)

**d**  
Artesunate

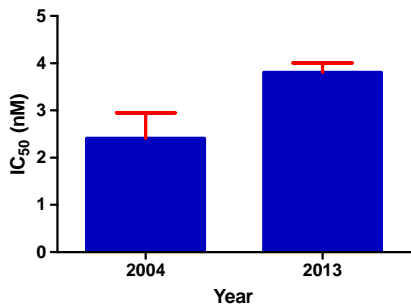

(NB: Before and after change in drug policy)

**e**  
Mefloquine

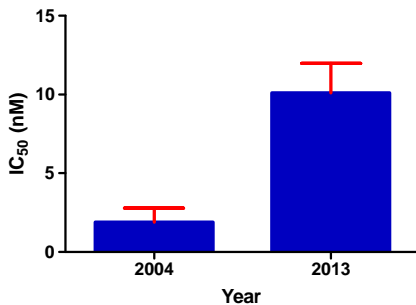

(NB: Before and after change in drug policy)
